# Supplementary material
Source: Springer Nature journal article supplement (https://www.springermedizin.de/resource/supplementary/12913_2013_3092_MOESM1_ESM.pdf/9532330)
Supplement: MOESM1 [file 9532330]

The basic foundations

1. Strategy and managerial commitment

2. Chain chemistry

3. Chain characteristics

How to manage the project organization

4. Steering and managing the project

How to develop and implement the service charter

5. The way of development and implementation

6. Patientfocus

7. Employeefocus
